# Supplementary material for: moSCminer: a cell subtype classification framework based on the attention neural network integrating the single-cell multi-omics dataset on the cloud
Source: PeerJ journal article supplement (doi:10.7717/peerj.17006), 2024-02-26
Supplement: SupplementaryTableS1.pdf [file SupplementaryTableS1.pdf]

**Supplementary Table S1**

Optimization results of the proposed method with the different combination of the parameters. Grid search was adopted for the model tuning, and the hyperparameters showing the best accuracy were selected. Row with the bolded font are the hyperparameters selected.

| GSE136718 Dataset            |                         |                        |              |                  |                 |  |
|------------------------------|-------------------------|------------------------|--------------|------------------|-----------------|--|
| Size of the embedding vector | Size of the $\bar{x}_i$ | # of nodes in FC layer | Dropout rate | Accuracy (train) | Accuracy (test) |  |
| 128                          | 64                      | 100                    | 0.6          | 1.000            | 0.976           |  |
| 128                          | 64                      | 100                    | 0.6          | 0.938            | 0.976           |  |
| 128                          | 64                      | 100                    | 0.6          | 1.000            | 0.952           |  |
| 128                          | 64                      | 100                    | 0.6          | 1.000            | 0.976           |  |
| 128                          | 64                      | 100                    | 0.6          | 1.000            | 0.976           |  |
| 128                          | 64                      | 100                    | 0.4          | 0.938            | 0.952           |  |
| 128                          | 64                      | 100                    | 0.4          | 1.000            | 0.976           |  |
| 128                          | 64                      | 100                    | 0.4          | 1.000            | 0.976           |  |
| 128                          | 64                      | 100                    | 0.4          | 1.000            | 0.976           |  |
| 128                          | 64                      | 100                    | 0.4          | 1.000            | 0.976           |  |
| 128                          | 64                      | 100                    | 0.2          | 1.000            | 0.952           |  |
| 128                          | 64                      | 100                    | 0.2          | 1.000            | 0.976           |  |
| 128                          | 64                      | 100                    | 0.2          | 1.000            | 0.952           |  |
| 128                          | 64                      | 100                    | 0.2          | 1.000            | 0.976           |  |
| <b>128</b>                   | <b>64</b>               | <b>100</b>             | <b>0.2</b>   | <b>1.000</b>     | <b>1.000</b>    |  |
| 128                          | 64                      | 100                    | 0            | 0.938            | 0.976           |  |
| 128                          | 64                      | 100                    | 0            | 0.938            | 0.952           |  |
| 128                          | 64                      | 100                    | 0            | 1.000            | 0.905           |  |
| 128                          | 64                      | 100                    | 0            | 1.000            | 0.952           |  |
| 128                          | 64                      | 100                    | 0            | 0.938            | 0.976           |  |
| 128                          | 64                      | 50                     | 0.6          | 0.875            | 0.905           |  |
| 128                          | 64                      | 50                     | 0.6          | 1.000            | 0.952           |  |
| 128                          | 64                      | 50                     | 0.6          | 0.875            | 0.952           |  |
| 128                          | 64                      | 50                     | 0.6          | 0.938            | 0.952           |  |
| 128                          | 64                      | 50                     | 0.6          | 1.000            | 0.976           |  |
| 128                          | 64                      | 50                     | 0.4          | 0.875            | 0.976           |  |
| 128                          | 64                      | 50                     | 0.4          | 0.813            | 0.952           |  |
| 128                          | 64                      | 50                     | 0.4          | 1.000            | 0.976           |  |
| 128                          | 64                      | 50                     | 0.4          | 1.000            | 0.976           |  |
| 128                          | 64                      | 50                     | 0.4          | 0.875            | 0.976           |  |
| 128                          | 64                      | 50                     | 0.2          | 1.000            | 0.976           |  |
| 128                          | 64                      | 50                     | 0.2          | 1.000            | 1.000           |  |
| 128                          | 64                      | 50                     | 0.2          | 0.938            | 0.976           |  |
| 128                          | 64                      | 50                     | 0.2          | 1.000            | 0.976           |  |
| 128                          | 64                      | 50                     | 0.2          | 0.750            | 0.952           |  |
| 128                          | 64                      | 50                     | 0            | 1.000            | 0.929           |  |
| 128                          | 64                      | 50                     | 0            | 1.000            | 0.881           |  |
| 128                          | 64                      | 50                     | 0            | 1.000            | 0.976           |  |
| 128                          | 64                      | 50                     | 0            | 1.000            | 0.952           |  |
| 128                          | 64                      | 50                     | 0            | 1.000            | 1.000           |  |
| 256                          | 128                     | 100                    | 0.6          | 1.000            | 0.976           |  |
| 256                          | 128                     | 100                    | 0.6          | 0.938            | 1.000           |  |
| 256                          | 128                     | 100                    | 0.6          | 1.000            | 1.000           |  |
| 256                          | 128                     | 100                    | 0.6          | 0.938            | 0.976           |  |
| 256                          | 128                     | 100                    | 0.6          | 0.875            | 0.976           |  |
| 256                          | 128                     | 100                    | 0.4          | 0.938            | 1.000           |  |
| 256                          | 128                     | 100                    | 0.4          | 1.000            | 0.976           |  |
| 256                          | 128                     | 100                    | 0.4          | 0.938            | 1.000           |  |
| 256                          | 128                     | 100                    | 0.4          | 1.000            | 0.976           |  |
| 256                          | 128                     | 100                    | 0.4          | 1.000            | 1.000           |  |
| 256                          | 128                     | 100                    | 0.4          | 1.000            | 1.000           |  |
| 256                          | 128                     | 100                    | 0.2          | 1.000            | 1.000           |  |
| 256                          | 128                     | 100                    | 0.2          | 1.000            | 1.000           |  |
| 256                          | 128                     | 100                    | 0.2          | 1.000            | 1.000           |  |
| 256                          | 128                     | 100                    | 0.2          | 1.000            | 0.976           |  |
| 256                          | 128                     | 100                    | 0            | 1.000            | 0.929           |  |
| 256                          | 128                     | 100                    | 0            | 0.875            | 0.976           |  |
| 256                          | 128                     | 100                    | 0            | 0.938            | 0.952           |  |
| 256                          | 128                     | 100                    | 0            | 1.000            | 0.952           |  |
| 256                          | 128                     | 100                    | 0            | 0.875            | 1.000           |  |
| 256                          | 128                     | 50                     | 0.6          | 1.000            | 0.976           |  |
| 256                          | 128                     | 50                     | 0.6          | 0.813            | 0.976           |  |
| 256                          | 128                     | 50                     | 0.6          | 0.813            | 0.976           |  |
| 256                          | 128                     | 50                     | 0.6          | 0.813            | 0.952           |  |
| 256                          | 128                     | 50                     | 0.6          | 1.000            | 0.976           |  |
| 256                          | 128                     | 50                     | 0.4          | 1.000            | 0.976           |  |

|     |     |     |     |       |       |
|-----|-----|-----|-----|-------|-------|
| 256 | 128 | 50  | 0.4 | 1.000 | 0.976 |
| 256 | 128 | 50  | 0.4 | 1.000 | 0.952 |
| 256 | 128 | 50  | 0.4 | 1.000 | 0.976 |
| 256 | 128 | 50  | 0.4 | 1.000 | 0.976 |
| 256 | 128 | 50  | 0.2 | 1.000 | 1.000 |
| 256 | 128 | 50  | 0.2 | 1.000 | 0.976 |
| 256 | 128 | 50  | 0.2 | 1.000 | 1.000 |
| 256 | 128 | 50  | 0.2 | 1.000 | 1.000 |
| 256 | 128 | 50  | 0.2 | 1.000 | 0.976 |
| 256 | 128 | 50  | 0   | 1.000 | 1.000 |
| 256 | 128 | 50  | 0   | 1.000 | 0.929 |
| 256 | 128 | 50  | 0   | 0.875 | 0.976 |
| 256 | 128 | 50  | 0   | 0.875 | 0.952 |
| 256 | 128 | 50  | 0   | 1.000 | 1.000 |
| 64  | 32  | 100 | 0.6 | 1.000 | 0.905 |
| 64  | 32  | 100 | 0.6 | 1.000 | 0.905 |
| 64  | 32  | 100 | 0.6 | 0.875 | 0.929 |
| 64  | 32  | 100 | 0.6 | 0.875 | 0.929 |
| 64  | 32  | 100 | 0.6 | 0.750 | 0.929 |
| 64  | 32  | 100 | 0.4 | 0.938 | 0.929 |
| 64  | 32  | 100 | 0.4 | 0.875 | 0.952 |
| 64  | 32  | 100 | 0.4 | 1.000 | 0.952 |
| 64  | 32  | 100 | 0.4 | 0.875 | 0.952 |
| 64  | 32  | 100 | 0.4 | 0.938 | 0.976 |
| 64  | 32  | 100 | 0.2 | 1.000 | 1.000 |
| 64  | 32  | 100 | 0.2 | 0.875 | 0.952 |
| 64  | 32  | 100 | 0.2 | 1.000 | 0.952 |
| 64  | 32  | 100 | 0.2 | 1.000 | 0.952 |
| 64  | 32  | 100 | 0.2 | 1.000 | 0.952 |
| 64  | 32  | 100 | 0   | 0.938 | 0.952 |
| 64  | 32  | 100 | 0   | 1.000 | 0.905 |
| 64  | 32  | 100 | 0   | 1.000 | 0.952 |
| 64  | 32  | 100 | 0   | 1.000 | 0.952 |
| 64  | 32  | 100 | 0   | 1.000 | 0.976 |
| 64  | 32  | 50  | 0.6 | 0.938 | 0.929 |
| 64  | 32  | 50  | 0.6 | 0.688 | 0.929 |
| 64  | 32  | 50  | 0.6 | 0.938 | 0.952 |
| 64  | 32  | 50  | 0.6 | 0.938 | 0.881 |
| 64  | 32  | 50  | 0.6 | 0.875 | 0.905 |
| 64  | 32  | 50  | 0.4 | 0.938 | 0.952 |
| 64  | 32  | 50  | 0.4 | 0.938 | 0.976 |
| 64  | 32  | 50  | 0.4 | 0.813 | 0.976 |
| 64  | 32  | 50  | 0.4 | 1.000 | 0.976 |
| 64  | 32  | 50  | 0.4 | 1.000 | 0.929 |
| 64  | 32  | 50  | 0.2 | 0.938 | 0.952 |
| 64  | 32  | 50  | 0.2 | 0.938 | 0.976 |
| 64  | 32  | 50  | 0.2 | 0.938 | 0.976 |
| 64  | 32  | 50  | 0.2 | 1.000 | 0.976 |
| 64  | 32  | 50  | 0.2 | 1.000 | 0.976 |
| 64  | 32  | 50  | 0   | 1.000 | 0.786 |
| 64  | 32  | 50  | 0   | 1.000 | 0.952 |
| 64  | 32  | 50  | 0   | 1.000 | 0.810 |
| 64  | 32  | 50  | 0   | 1.000 | 0.976 |
| 64  | 32  | 50  | 0   | 1.000 | 0.786 |
| 64  | 32  | 50  | 0   | 1.000 | 0.905 |
| 64  | 32  | 50  | 0   | 1.000 | 0.976 |
| 64  | 32  | 50  | 0   | 0.938 | 0.881 |

#### GSE154762 Dataset

| Size of the embedding vector | Size of the $\bar{x}_i$ | # of nodes in FC layer | Dropout rate | Accuracy (train) | Accuracy (test) |
|------------------------------|-------------------------|------------------------|--------------|------------------|-----------------|
| 128                          | 64                      | 100                    | 0.6          | 0.864            | 0.922           |
| 128                          | 64                      | 100                    | 0.6          | 0.864            | 0.906           |
| 128                          | 64                      | 100                    | 0.6          | 0.864            | 0.911           |
| 128                          | 64                      | 100                    | 0.6          | 0.909            | 0.922           |
| 128                          | 64                      | 100                    | 0.6          | 0.909            | 0.906           |
| 128                          | 64                      | 100                    | 0.4          | 0.955            | 0.911           |
| 128                          | 64                      | 100                    | 0.4          | 0.909            | 0.933           |
| 128                          | 64                      | 100                    | 0.4          | 0.955            | 0.933           |
| 128                          | 64                      | 100                    | 0.4          | 1.000            | 0.928           |
| 128                          | 64                      | 100                    | 0.4          | 1.000            | 0.917           |
| <b>128</b>                   | <b>64</b>               | <b>100</b>             | <b>0.2</b>   | <b>0.955</b>     | <b>0.939</b>    |
| 128                          | 64                      | 100                    | 0.2          | 1.000            | 0.922           |

|     |     |     |     |       |       |
|-----|-----|-----|-----|-------|-------|
| 128 | 64  | 100 | 0.2 | 0.955 | 0.922 |
| 128 | 64  | 100 | 0.2 | 0.955 | 0.911 |
| 128 | 64  | 100 | 0.2 | 1.000 | 0.922 |
| 128 | 64  | 100 | 0   | 0.909 | 0.917 |
| 128 | 64  | 100 | 0   | 1.000 | 0.917 |
| 128 | 64  | 100 | 0   | 1.000 | 0.933 |
| 128 | 64  | 100 | 0   | 0.955 | 0.922 |
| 128 | 64  | 100 | 0   | 1.000 | 0.950 |
| 128 | 64  | 50  | 0.6 | 0.864 | 0.900 |
| 128 | 64  | 50  | 0.6 | 0.864 | 0.900 |
| 128 | 64  | 50  | 0.6 | 0.682 | 0.872 |
| 128 | 64  | 50  | 0.6 | 0.955 | 0.906 |
| 128 | 64  | 50  | 0.6 | 0.955 | 0.906 |
| 128 | 64  | 50  | 0.4 | 0.864 | 0.911 |
| 128 | 64  | 50  | 0.4 | 0.955 | 0.928 |
| 128 | 64  | 50  | 0.4 | 0.909 | 0.928 |
| 128 | 64  | 50  | 0.4 | 1.000 | 0.906 |
| 128 | 64  | 50  | 0.4 | 0.955 | 0.911 |
| 128 | 64  | 50  | 0.2 | 1.000 | 0.922 |
| 128 | 64  | 50  | 0.2 | 0.909 | 0.933 |
| 128 | 64  | 50  | 0.2 | 1.000 | 0.950 |
| 128 | 64  | 50  | 0.2 | 0.864 | 0.922 |
| 128 | 64  | 50  | 0.2 | 0.864 | 0.939 |
| 128 | 64  | 50  | 0   | 1.000 | 0.906 |
| 128 | 64  | 50  | 0   | 1.000 | 0.922 |
| 128 | 64  | 50  | 0   | 1.000 | 0.906 |
| 128 | 64  | 50  | 0   | 1.000 | 0.900 |
| 128 | 64  | 50  | 0   | 1.000 | 0.939 |
| 256 | 128 | 100 | 0.6 | 0.864 | 0.911 |
| 256 | 128 | 100 | 0.6 | 1.000 | 0.906 |
| 256 | 128 | 100 | 0.6 | 0.909 | 0.889 |
| 256 | 128 | 100 | 0.6 | 0.864 | 0.911 |
| 256 | 128 | 100 | 0.6 | 0.955 | 0.900 |
| 256 | 128 | 100 | 0.4 | 0.955 | 0.906 |
| 256 | 128 | 100 | 0.4 | 1.000 | 0.917 |
| 256 | 128 | 100 | 0.4 | 1.000 | 0.917 |
| 256 | 128 | 100 | 0.4 | 1.000 | 0.900 |
| 256 | 128 | 100 | 0.4 | 0.909 | 0.911 |
| 256 | 128 | 100 | 0.2 | 1.000 | 0.928 |
| 256 | 128 | 100 | 0.2 | 1.000 | 0.917 |
| 256 | 128 | 100 | 0.2 | 0.955 | 0.911 |
| 256 | 128 | 100 | 0.2 | 1.000 | 0.911 |
| 256 | 128 | 100 | 0.2 | 0.955 | 0.928 |
| 256 | 128 | 100 | 0   | 1.000 | 0.906 |
| 256 | 128 | 100 | 0   | 0.955 | 0.911 |
| 256 | 128 | 100 | 0   | 1.000 | 0.944 |
| 256 | 128 | 100 | 0   | 0.955 | 0.906 |
| 256 | 128 | 100 | 0   | 1.000 | 0.917 |
| 256 | 128 | 50  | 0.6 | 0.864 | 0.906 |
| 256 | 128 | 50  | 0.6 | 0.955 | 0.911 |
| 256 | 128 | 50  | 0.6 | 0.909 | 0.900 |
| 256 | 128 | 50  | 0.6 | 0.864 | 0.906 |
| 256 | 128 | 50  | 0.6 | 0.864 | 0.900 |
| 256 | 128 | 50  | 0.4 | 0.864 | 0.861 |
| 256 | 128 | 50  | 0.4 | 0.909 | 0.911 |
| 256 | 128 | 50  | 0.4 | 0.955 | 0.894 |
| 256 | 128 | 50  | 0.4 | 0.909 | 0.911 |
| 256 | 128 | 50  | 0.4 | 0.955 | 0.883 |
| 256 | 128 | 50  | 0.2 | 1.000 | 0.906 |
| 256 | 128 | 50  | 0.2 | 0.955 | 0.922 |
| 256 | 128 | 50  | 0.2 | 0.955 | 0.917 |
| 256 | 128 | 50  | 0.2 | 1.000 | 0.900 |
| 256 | 128 | 50  | 0.2 | 1.000 | 0.917 |
| 256 | 128 | 50  | 0   | 1.000 | 0.917 |
| 256 | 128 | 50  | 0   | 1.000 | 0.950 |
| 256 | 128 | 50  | 0   | 1.000 | 0.944 |
| 256 | 128 | 50  | 0   | 0.955 | 0.922 |
| 256 | 128 | 50  | 0   | 1.000 | 0.922 |
| 64  | 32  | 100 | 0.6 | 1.000 | 0.894 |
| 64  | 32  | 100 | 0.6 | 0.682 | 0.872 |
| 64  | 32  | 100 | 0.6 | 0.773 | 0.900 |
| 64  | 32  | 100 | 0.6 | 0.818 | 0.906 |
| 64  | 32  | 100 | 0.6 | 0.864 | 0.883 |

|    |    |     |     |       |       |
|----|----|-----|-----|-------|-------|
| 64 | 32 | 100 | 0.4 | 0.864 | 0.917 |
| 64 | 32 | 100 | 0.4 | 0.955 | 0.883 |
| 64 | 32 | 100 | 0.4 | 0.773 | 0.894 |
| 64 | 32 | 100 | 0.4 | 0.864 | 0.917 |
| 64 | 32 | 100 | 0.4 | 1.000 | 0.917 |
| 64 | 32 | 100 | 0.2 | 0.955 | 0.956 |
| 64 | 32 | 100 | 0.2 | 1.000 | 0.922 |
| 64 | 32 | 100 | 0.2 | 1.000 | 0.850 |
| 64 | 32 | 100 | 0.2 | 0.909 | 0.928 |
| 64 | 32 | 100 | 0.2 | 0.909 | 0.939 |
| 64 | 32 | 100 | 0   | 1.000 | 0.922 |
| 64 | 32 | 100 | 0   | 0.955 | 0.872 |
| 64 | 32 | 100 | 0   | 1.000 | 0.900 |
| 64 | 32 | 100 | 0   | 1.000 | 0.922 |
| 64 | 32 | 100 | 0   | 1.000 | 0.922 |
| 64 | 32 | 50  | 0.6 | 0.864 | 0.861 |
| 64 | 32 | 50  | 0.6 | 0.773 | 0.833 |
| 64 | 32 | 50  | 0.6 | 0.727 | 0.833 |
| 64 | 32 | 50  | 0.6 | 0.864 | 0.906 |
| 64 | 32 | 50  | 0.6 | 0.909 | 0.861 |
| 64 | 32 | 50  | 0.4 | 1.000 | 0.917 |
| 64 | 32 | 50  | 0.4 | 0.818 | 0.867 |
| 64 | 32 | 50  | 0.4 | 0.864 | 0.883 |
| 64 | 32 | 50  | 0.4 | 0.727 | 0.900 |
| 64 | 32 | 50  | 0.4 | 0.909 | 0.900 |
| 64 | 32 | 50  | 0.2 | 0.909 | 0.922 |
| 64 | 32 | 50  | 0.2 | 0.955 | 0.928 |
| 64 | 32 | 50  | 0.2 | 1.000 | 0.944 |
| 64 | 32 | 50  | 0.2 | 0.818 | 0.906 |
| 64 | 32 | 50  | 0.2 | 0.955 | 0.911 |
| 64 | 32 | 50  | 0   | 1.000 | 0.939 |
| 64 | 32 | 50  | 0   | 1.000 | 0.894 |
| 64 | 32 | 50  | 0   | 0.955 | 0.889 |
| 64 | 32 | 50  | 0   | 1.000 | 0.911 |
| 64 | 32 | 50  | 0   | 1.000 | 0.889 |

---
