# Supplementary material for: moSCminer: a cell subtype classification framework based on the attention neural network integrating the single-cell multi-omics dataset on the cloud
Source: PeerJ journal article supplement (doi:10.7717/peerj.17006), 2024-02-26
Supplement: SupplementaryTableS2.pdf [file SupplementaryTableS2.pdf]

**Supplementary Table S2.**

Optimization results for GSE136718 dataset of the baseline methods with the different combination of the parameters.

Grid search was adopted for the model tuning, and the hyperparameters showing the best accuracy were selected.

Row with the bolded font are the hyperparameters selected.

| <b>Support vector machine (SVM)</b> |                       |                          |               |
|-------------------------------------|-----------------------|--------------------------|---------------|
| Kernel                              | Penalty parameter (C) | RBF kernel coeff (Gamma) | Accruacy      |
| RBF                                 | 2 <sup>-5</sup>       | 2 <sup>-15</sup>         | 0.2063        |
| RBF                                 | 2 <sup>-5</sup>       | 2 <sup>-13</sup>         | 0.2063        |
| RBF                                 | 2 <sup>-5</sup>       | 2 <sup>-11</sup>         | 0.2063        |
| RBF                                 | 2 <sup>-5</sup>       | 2 <sup>-9</sup>          | 0.2063        |
| RBF                                 | 2 <sup>-5</sup>       | 2 <sup>-7</sup>          | 0.2063        |
| RBF                                 | 2 <sup>-5</sup>       | 2 <sup>-5</sup>          | 0.2063        |
| RBF                                 | 2 <sup>-5</sup>       | 2 <sup>-3</sup>          | 0.2063        |
| RBF                                 | 2 <sup>-5</sup>       | 2 <sup>-1</sup>          | 0.2063        |
| RBF                                 | 2 <sup>-5</sup>       | 2 <sup>1</sup>           | 0.2063        |
| RBF                                 | 2 <sup>-5</sup>       | 2 <sup>3</sup>           | 0.2063        |
| RBF                                 | 2 <sup>-3</sup>       | 2 <sup>-15</sup>         | 0.2063        |
| RBF                                 | 2 <sup>-3</sup>       | 2 <sup>-13</sup>         | 0.2063        |
| RBF                                 | 2 <sup>-3</sup>       | 2 <sup>-11</sup>         | 0.2063        |
| RBF                                 | 2 <sup>-3</sup>       | 2 <sup>-9</sup>          | 0.2063        |
| RBF                                 | 2 <sup>-3</sup>       | 2 <sup>-7</sup>          | 0.2063        |
| RBF                                 | 2 <sup>-3</sup>       | 2 <sup>-5</sup>          | 0.3651        |
| RBF                                 | 2 <sup>-3</sup>       | 2 <sup>-3</sup>          | 0.3333        |
| RBF                                 | 2 <sup>-3</sup>       | 2 <sup>-1</sup>          | 0.2063        |
| RBF                                 | 2 <sup>-3</sup>       | 2 <sup>1</sup>           | 0.2063        |
| RBF                                 | 2 <sup>-3</sup>       | 2 <sup>3</sup>           | 0.2063        |
| RBF                                 | 2 <sup>-1</sup>       | 2 <sup>-15</sup>         | 0.2063        |
| RBF                                 | 2 <sup>-1</sup>       | 2 <sup>-13</sup>         | 0.2063        |
| RBF                                 | 2 <sup>-1</sup>       | 2 <sup>-11</sup>         | 0.2063        |
| RBF                                 | 2 <sup>-1</sup>       | 2 <sup>-9</sup>          | 0.2698        |
| RBF                                 | 2 <sup>-1</sup>       | 2 <sup>-7</sup>          | 0.3651        |
| RBF                                 | 2 <sup>-1</sup>       | 2 <sup>-5</sup>          | 0.7302        |
| RBF                                 | 2 <sup>-1</sup>       | 2 <sup>-3</sup>          | 0.7937        |
| RBF                                 | 2 <sup>-1</sup>       | 2 <sup>-1</sup>          | 0.2063        |
| RBF                                 | 2 <sup>-1</sup>       | 2 <sup>1</sup>           | 0.2063        |
| RBF                                 | 2 <sup>-1</sup>       | 2 <sup>3</sup>           | 0.2063        |
| RBF                                 | 2 <sup>0</sup>        | 2 <sup>-15</sup>         | 0.2063        |
| RBF                                 | 2 <sup>0</sup>        | 2 <sup>-13</sup>         | 0.2063        |
| RBF                                 | 2 <sup>0</sup>        | 2 <sup>-11</sup>         | 0.2063        |
| RBF                                 | 2 <sup>0</sup>        | 2 <sup>-9</sup>          | 0.3492        |
| RBF                                 | 2 <sup>0</sup>        | 2 <sup>-7</sup>          | 0.4762        |
| RBF                                 | 2 <sup>0</sup>        | 2 <sup>-5</sup>          | 0.8889        |
| RBF                                 | 2 <sup>0</sup>        | 2 <sup>-3</sup>          | 0.9206        |
| RBF                                 | 2 <sup>0</sup>        | 2 <sup>-1</sup>          | 0.3333        |
| RBF                                 | 2 <sup>0</sup>        | 2 <sup>1</sup>           | 0.2063        |
| RBF                                 | 2 <sup>0</sup>        | 2 <sup>3</sup>           | 0.2063        |
| RBF                                 | 2 <sup>1</sup>        | 2 <sup>-15</sup>         | 0.2063        |
| RBF                                 | 2 <sup>1</sup>        | 2 <sup>-13</sup>         | 0.2063        |
| RBF                                 | 2 <sup>1</sup>        | 2 <sup>-11</sup>         | 0.2857        |
| RBF                                 | 2 <sup>1</sup>        | 2 <sup>-9</sup>          | 0.3651        |
| RBF                                 | 2 <sup>1</sup>        | 2 <sup>-7</sup>          | 0.7937        |
| <b>RBF</b>                          | <b>2<sup>1</sup></b>  | <b>2<sup>-5</sup></b>    | <b>0.9683</b> |
| RBF                                 | 2 <sup>1</sup>        | 2 <sup>-3</sup>          | 0.9365        |
| RBF                                 | 2 <sup>1</sup>        | 2 <sup>-1</sup>          | 0.381         |
| RBF                                 | 2 <sup>1</sup>        | 2 <sup>1</sup>           | 0.2063        |
| RBF                                 | 2 <sup>1</sup>        | 2 <sup>3</sup>           | 0.2063        |
| RBF                                 | 2 <sup>3</sup>        | 2 <sup>-15</sup>         | 0.2063        |
| RBF                                 | 2 <sup>3</sup>        | 2 <sup>-13</sup>         | 0.2857        |
| RBF                                 | 2 <sup>3</sup>        | 2 <sup>-11</sup>         | 0.3651        |
| RBF                                 | 2 <sup>3</sup>        | 2 <sup>-9</sup>          | 0.8095        |

|        |                 |                  |        |
|--------|-----------------|------------------|--------|
| RBF    | 2 <sup>3</sup>  | 2 <sup>-7</sup>  | 0.9683 |
| RBF    | 2 <sup>3</sup>  | 2 <sup>-5</sup>  | 0.9524 |
| RBF    | 2 <sup>3</sup>  | 2 <sup>-3</sup>  | 0.9365 |
| RBF    | 2 <sup>3</sup>  | 2 <sup>-1</sup>  | 0.381  |
| RBF    | 2 <sup>3</sup>  | 2 <sup>1</sup>   | 0.2063 |
| RBF    | 2 <sup>3</sup>  | 2 <sup>3</sup>   | 0.2063 |
| RBF    | 2 <sup>5</sup>  | 2 <sup>-15</sup> | 0.2857 |
| RBF    | 2 <sup>5</sup>  | 2 <sup>-13</sup> | 0.3651 |
| RBF    | 2 <sup>5</sup>  | 2 <sup>-11</sup> | 0.8095 |
| RBF    | 2 <sup>5</sup>  | 2 <sup>-9</sup>  | 0.9683 |
| RBF    | 2 <sup>5</sup>  | 2 <sup>-7</sup>  | 0.9524 |
| RBF    | 2 <sup>5</sup>  | 2 <sup>-5</sup>  | 0.9524 |
| RBF    | 2 <sup>5</sup>  | 2 <sup>-3</sup>  | 0.9365 |
| RBF    | 2 <sup>5</sup>  | 2 <sup>-1</sup>  | 0.381  |
| RBF    | 2 <sup>5</sup>  | 2 <sup>1</sup>   | 0.2063 |
| RBF    | 2 <sup>5</sup>  | 2 <sup>3</sup>   | 0.2063 |
| Linear | 2 <sup>-5</sup> | -                | 0.2063 |
| Linear | 2 <sup>-3</sup> | -                | 0.2063 |
| Linear | 2 <sup>-1</sup> | -                | 0.2063 |
| Linear | 2 <sup>0</sup>  | -                | 0.9206 |
| Linear | 2 <sup>1</sup>  | -                | 0.9683 |
| Linear | 2 <sup>3</sup>  | -                | 0.9683 |
| Linear | 2 <sup>5</sup>  | -                | 0.9683 |

#### Random Forest (RF)

| Split criteria<br>(criterion) | # of trees<br>(estimators) | The minimum # of<br>samples in a leaf<br>node | Accruacy      |
|-------------------------------|----------------------------|-----------------------------------------------|---------------|
|                               |                            | (min samples leaf)                            |               |
| Gini impurity                 | 100                        | 1                                             | 0.9365        |
| Gini impurity                 | 100                        | 2                                             | 0.9524        |
| Gini impurity                 | 100                        | 3                                             | 0.9524        |
| Gini impurity                 | 100                        | 4                                             | 0.9365        |
| <b>Gini impurity</b>          | <b>100</b>                 | <b>5</b>                                      | <b>0.9683</b> |
| Gini impurity                 | 300                        | 1                                             | 0.9524        |
| Gini impurity                 | 300                        | 2                                             | 0.9365        |
| Gini impurity                 | 300                        | 3                                             | 0.9524        |
| Gini impurity                 | 300                        | 4                                             | 0.9524        |
| Gini impurity                 | 300                        | 5                                             | 0.9524        |
| Gini impurity                 | 500                        | 1                                             | 0.9365        |
| Gini impurity                 | 500                        | 2                                             | 0.9524        |
| Gini impurity                 | 500                        | 3                                             | 0.9365        |
| Gini impurity                 | 500                        | 4                                             | 0.9365        |
| Gini impurity                 | 500                        | 5                                             | 0.9365        |
| Gini impurity                 | 700                        | 1                                             | 0.9524        |
| Gini impurity                 | 700                        | 2                                             | 0.9524        |
| Gini impurity                 | 700                        | 3                                             | 0.9524        |
| Gini impurity                 | 700                        | 4                                             | 0.9524        |
| Gini impurity                 | 700                        | 5                                             | 0.9365        |
| Gini impurity                 | 900                        | 1                                             | 0.9524        |
| Gini impurity                 | 900                        | 2                                             | 0.9524        |
| Gini impurity                 | 900                        | 3                                             | 0.9524        |
| Gini impurity                 | 900                        | 4                                             | 0.9524        |
| Gini impurity                 | 900                        | 5                                             | 0.9524        |
| entropy                       | 100                        | 1                                             | 0.9365        |
| entropy                       | 100                        | 2                                             | 0.9683        |
| entropy                       | 100                        | 3                                             | 0.9365        |
| entropy                       | 100                        | 4                                             | 0.9524        |
| entropy                       | 100                        | 5                                             | 0.9365        |
| entropy                       | 300                        | 1                                             | 0.9524        |
| entropy                       | 300                        | 2                                             | 0.9524        |

|         |     |   |        |
|---------|-----|---|--------|
| entropy | 300 | 3 | 0.9365 |
| entropy | 300 | 4 | 0.9524 |
| entropy | 300 | 5 | 0.9365 |
| entropy | 500 | 1 | 0.9365 |
| entropy | 500 | 2 | 0.9524 |
| entropy | 500 | 3 | 0.9365 |
| entropy | 500 | 4 | 0.9365 |
| entropy | 500 | 5 | 0.9365 |
| entropy | 700 | 1 | 0.9365 |
| entropy | 700 | 2 | 0.9524 |
| entropy | 700 | 3 | 0.9524 |
| entropy | 700 | 4 | 0.9365 |
| entropy | 700 | 5 | 0.9365 |
| entropy | 900 | 1 | 0.9365 |
| entropy | 900 | 2 | 0.9365 |
| entropy | 900 | 3 | 0.9524 |
| entropy | 900 | 4 | 0.9524 |
| entropy | 900 | 5 | 0.9365 |

---

**Logistic Regression (LR)**

---

| max_iter<br>(maximum number<br>of iterations to<br>converge) | Penalty parameter (C) | Accuracy      |
|--------------------------------------------------------------|-----------------------|---------------|
| 100                                                          | 0.03125               | 0.6667        |
| 100                                                          | 0.125                 | 0.8571        |
| <b>100</b>                                                   | <b>0.5</b>            | <b>0.9683</b> |
| 100                                                          | 1                     | 0.9683        |
| 100                                                          | 2                     | 0.9524        |
| 100                                                          | 8                     | 0.9524        |
| 100                                                          | 32                    | 0.9524        |
| 200                                                          | 0.03125               | 0.6667        |
| 200                                                          | 0.125                 | 0.8571        |
| 200                                                          | 0.5                   | 0.9683        |
| 200                                                          | 1                     | 0.9683        |
| 200                                                          | 2                     | 0.9524        |
| 200                                                          | 8                     | 0.9524        |
| 200                                                          | 32                    | 0.9524        |
| 300                                                          | 0.03125               | 0.6667        |
| 300                                                          | 0.125                 | 0.8571        |
| 300                                                          | 0.5                   | 0.9683        |
| 300                                                          | 1                     | 0.9683        |
| 300                                                          | 2                     | 0.9524        |
| 300                                                          | 8                     | 0.9524        |
| 300                                                          | 32                    | 0.9524        |
| 400                                                          | 0.03125               | 0.6667        |
| 400                                                          | 0.125                 | 0.8571        |
| 400                                                          | 0.5                   | 0.9683        |
| 400                                                          | 1                     | 0.9683        |
| 400                                                          | 2                     | 0.9524        |
| 400                                                          | 8                     | 0.9524        |
| 400                                                          | 32                    | 0.9524        |
| 500                                                          | 0.03125               | 0.6667        |
| 500                                                          | 0.125                 | 0.8571        |
| 500                                                          | 0.5                   | 0.9683        |
| 500                                                          | 1                     | 0.9683        |
| 500                                                          | 2                     | 0.9524        |
| 500                                                          | 8                     | 0.9524        |
| 500                                                          | 32                    | 0.9524        |

---
