# Supplementary material for: moSCminer: a cell subtype classification framework based on the attention neural network integrating the single-cell multi-omics dataset on the cloud
Source: PeerJ journal article supplement (doi:10.7717/peerj.17006), 2024-02-26
Supplement: SupplementaryTableS4.pdf [file SupplementaryTableS4.pdf]

**Supplementary Table S4.**

Optimization results for GSE140203 dataset of the baseline methods with the different combination of the parameters.

Grid search was adopted for the model tuning, and the hyperparameters showing the best accuracy were selected.

Row with the bolded font are the hyperparameters selected.

| <b>Support vector machine (SVM)</b> |                       |                             |          |
|-------------------------------------|-----------------------|-----------------------------|----------|
| Kernel                              | Penalty parameter (C) | RBF kernel coeff<br>(Gamma) | Accruacy |
| RBF                                 | $2^{-5}$              | $2^{-15}$                   | 0.2431   |
| RBF                                 | $2^{-5}$              | $2^{-13}$                   | 0.2431   |
| RBF                                 | $2^{-5}$              | $2^{-11}$                   | 0.2431   |
| RBF                                 | $2^{-5}$              | $2^{-9}$                    | 0.2431   |
| RBF                                 | $2^{-5}$              | $2^{-7}$                    | 0.3844   |
| RBF                                 | $2^{-5}$              | $2^{-5}$                    | 0.5282   |
| RBF                                 | $2^{-5}$              | $2^{-3}$                    | 0.2525   |
| RBF                                 | $2^{-5}$              | $2^{-1}$                    | 0.2431   |
| RBF                                 | $2^{-5}$              | $2^1$                       | 0.2431   |
| RBF                                 | $2^{-5}$              | $2^3$                       | 0.2431   |
| RBF                                 | $2^{-3}$              | $2^{-15}$                   | 0.2431   |
| RBF                                 | $2^{-3}$              | $2^{-13}$                   | 0.2431   |
| RBF                                 | $2^{-3}$              | $2^{-11}$                   | 0.2432   |
| RBF                                 | $2^{-3}$              | $2^{-9}$                    | 0.4210   |
| RBF                                 | $2^{-3}$              | $2^{-7}$                    | 0.6439   |
| RBF                                 | $2^{-3}$              | $2^{-5}$                    | 0.7011   |
| RBF                                 | $2^{-3}$              | $2^{-3}$                    | 0.4982   |
| RBF                                 | $2^{-3}$              | $2^{-1}$                    | 0.2431   |
| RBF                                 | $2^{-3}$              | $2^1$                       | 0.2431   |
| RBF                                 | $2^{-3}$              | $2^3$                       | 0.2431   |
| RBF                                 | $2^{-1}$              | $2^{-15}$                   | 0.2431   |
| RBF                                 | $2^{-1}$              | $2^{-13}$                   | 0.2432   |
| RBF                                 | $2^{-1}$              | $2^{-11}$                   | 0.4297   |
| RBF                                 | $2^{-1}$              | $2^{-9}$                    | 0.6569   |
| RBF                                 | $2^{-1}$              | $2^{-7}$                    | 0.7448   |
| RBF                                 | $2^{-1}$              | $2^{-5}$                    | 0.7742   |
| RBF                                 | $2^{-1}$              | $2^{-3}$                    | 0.7006   |
| RBF                                 | $2^{-1}$              | $2^{-1}$                    | 0.2431   |
| RBF                                 | $2^{-1}$              | $2^1$                       | 0.2431   |
| RBF                                 | $2^{-1}$              | $2^3$                       | 0.2431   |
| RBF                                 | $2^0$                 | $2^{-15}$                   | 0.2431   |
| RBF                                 | $2^0$                 | $2^{-13}$                   | 0.3085   |
| RBF                                 | $2^0$                 | $2^{-11}$                   | 0.5730   |
| RBF                                 | $2^0$                 | $2^{-9}$                    | 0.7082   |
| RBF                                 | $2^0$                 | $2^{-7}$                    | 0.7732   |
| RBF                                 | $2^0$                 | $2^{-5}$                    | 0.7928   |
| RBF                                 | $2^0$                 | $2^{-3}$                    | 0.7452   |
| RBF                                 | $2^0$                 | $2^{-1}$                    | 0.2431   |
| RBF                                 | $2^0$                 | $2^1$                       | 0.2431   |
| RBF                                 | $2^0$                 | $2^3$                       | 0.2431   |
| RBF                                 | $2^1$                 | $2^{-15}$                   | 0.2432   |
| RBF                                 | $2^1$                 | $2^{-13}$                   | 0.4321   |
| RBF                                 | $2^1$                 | $2^{-11}$                   | 0.6594   |
| RBF                                 | $2^1$                 | $2^{-9}$                    | 0.7509   |
| RBF                                 | $2^1$                 | $2^{-7}$                    | 0.7877   |
| RBF                                 | $2^1$                 | $2^{-5}$                    | 0.7973   |
| RBF                                 | $2^1$                 | $2^{-3}$                    | 0.7571   |
| RBF                                 | $2^1$                 | $2^{-1}$                    | 0.2431   |
| RBF                                 | $2^1$                 | $2^1$                       | 0.2431   |
| RBF                                 | $2^1$                 | $2^3$                       | 0.2431   |
| RBF                                 | $2^3$                 | $2^{-15}$                   | 0.4334   |
| RBF                                 | $2^3$                 | $2^{-13}$                   | 0.6600   |
| RBF                                 | $2^3$                 | $2^{-11}$                   | 0.7506   |
| RBF                                 | $2^3$                 | $2^{-9}$                    | 0.7877   |

|            |                      |                       |               |
|------------|----------------------|-----------------------|---------------|
| RBF        | 2 <sup>3</sup>       | 2 <sup>-7</sup>       | 0.7973        |
| <b>RBF</b> | <b>2<sup>3</sup></b> | <b>2<sup>-5</sup></b> | <b>0.8030</b> |
| RBF        | 2 <sup>3</sup>       | 2 <sup>-3</sup>       | 0.7569        |
| RBF        | 2 <sup>3</sup>       | 2 <sup>-1</sup>       | 0.2431        |
| RBF        | 2 <sup>3</sup>       | 2 <sup>1</sup>        | 0.2431        |
| RBF        | 2 <sup>3</sup>       | 2 <sup>3</sup>        | 0.2431        |
| RBF        | 2 <sup>5</sup>       | 2 <sup>-15</sup>      | 0.6602        |
| RBF        | 2 <sup>5</sup>       | 2 <sup>-13</sup>      | 0.7514        |
| RBF        | 2 <sup>5</sup>       | 2 <sup>-11</sup>      | 0.7861        |
| RBF        | 2 <sup>5</sup>       | 2 <sup>-9</sup>       | 0.7970        |
| RBF        | 2 <sup>5</sup>       | 2 <sup>-7</sup>       | 0.8022        |
| RBF        | 2 <sup>5</sup>       | 2 <sup>-5</sup>       | 0.8033        |
| RBF        | 2 <sup>5</sup>       | 2 <sup>-3</sup>       | 0.7569        |
| RBF        | 2 <sup>5</sup>       | 2 <sup>-1</sup>       | 0.2431        |
| RBF        | 2 <sup>5</sup>       | 2 <sup>1</sup>        | 0.2431        |
| RBF        | 2 <sup>5</sup>       | 2 <sup>3</sup>        | 0.2431        |
| Linear     | 2 <sup>-5</sup>      | -                     | 0.7866        |
| Linear     | 2 <sup>-3</sup>      | -                     | 0.7949        |
| Linear     | 2 <sup>-1</sup>      | -                     | 0.7897        |
| Linear     | 2 <sup>0</sup>       | -                     | 0.7832        |
| Linear     | 2 <sup>1</sup>       | -                     | 0.7881        |
| Linear     | 2 <sup>3</sup>       | -                     | 0.7864        |
| Linear     | 2 <sup>5</sup>       | -                     | 0.7814        |

#### Random Forest (RF)

| Split criteria<br>(criterion) | # of trees<br>(estimators) | The minimum # of<br>samples in a leaf<br>node | Accruacy |
|-------------------------------|----------------------------|-----------------------------------------------|----------|
|                               |                            | (min samples leaf)                            |          |
| Gini impurity                 | 100                        | 1                                             | 0.9234   |
| Gini impurity                 | 100                        | 2                                             | 0.9265   |
| Gini impurity                 | 100                        | 3                                             | 0.9232   |
| Gini impurity                 | 100                        | 4                                             | 0.9248   |
| Gini impurity                 | 100                        | 5                                             | 0.9198   |
| Gini impurity                 | 300                        | 1                                             | 0.9322   |
| Gini impurity                 | 300                        | 2                                             | 0.9308   |
| Gini impurity                 | 300                        | 3                                             | 0.9349   |
| Gini impurity                 | 300                        | 4                                             | 0.9305   |
| Gini impurity                 | 300                        | 5                                             | 0.9269   |
| Gini impurity                 | 500                        | 1                                             | 0.9339   |
| Gini impurity                 | 500                        | 2                                             | 0.9364   |
| Gini impurity                 | 500                        | 3                                             | 0.9330   |
| Gini impurity                 | 500                        | 4                                             | 0.9327   |
| Gini impurity                 | 500                        | 5                                             | 0.9305   |
| Gini impurity                 | 700                        | 1                                             | 0.9390   |
| Gini impurity                 | 700                        | 2                                             | 0.9375   |
| Gini impurity                 | 700                        | 3                                             | 0.9353   |
| Gini impurity                 | 700                        | 4                                             | 0.9321   |
| Gini impurity                 | 700                        | 5                                             | 0.9322   |
| Gini impurity                 | 900                        | 1                                             | 0.9395   |
| Gini impurity                 | 900                        | 2                                             | 0.9366   |
| Gini impurity                 | 900                        | 3                                             | 0.9342   |
| Gini impurity                 | 900                        | 4                                             | 0.9349   |
| Gini impurity                 | 900                        | 5                                             | 0.9307   |
| entropy                       | 100                        | 1                                             | 0.9313   |
| entropy                       | 100                        | 2                                             | 0.9300   |
| entropy                       | 100                        | 3                                             | 0.9310   |
| entropy                       | 100                        | 4                                             | 0.9330   |
| entropy                       | 100                        | 5                                             | 0.9290   |
| entropy                       | 300                        | 1                                             | 0.9395   |
| entropy                       | 300                        | 2                                             | 0.9378   |

|                |            |          |               |
|----------------|------------|----------|---------------|
| entropy        | 300        | 3        | 0.9395        |
| entropy        | 300        | 4        | 0.9358        |
| entropy        | 300        | 5        | 0.9386        |
| entropy        | 500        | 1        | 0.9420        |
| entropy        | 500        | 2        | 0.9428        |
| entropy        | 500        | 3        | 0.9411        |
| entropy        | 500        | 4        | 0.9394        |
| entropy        | 500        | 5        | 0.9401        |
| entropy        | 700        | 1        | 0.9437        |
| <b>entropy</b> | <b>700</b> | <b>2</b> | <b>0.9442</b> |
| entropy        | 700        | 3        | 0.9411        |
| entropy        | 700        | 4        | 0.9414        |
| entropy        | 700        | 5        | 0.9411        |
| entropy        | 900        | 1        | 0.9432        |
| entropy        | 900        | 2        | 0.9421        |
| entropy        | 900        | 3        | 0.9429        |
| entropy        | 900        | 4        | 0.9415        |
| entropy        | 900        | 5        | 0.9397        |

---

**Logistic Regression (LR)**

---

| max_iter<br>(maximum number<br>of iterations to<br>converge) | Penalty parameter (C) | Accuracy |
|--------------------------------------------------------------|-----------------------|----------|
|--------------------------------------------------------------|-----------------------|----------|

---

|            |          |               |
|------------|----------|---------------|
| 100        | 0.03125  | 0.7639        |
| 100        | 0.125    | 0.7886        |
| 100        | 0.5      | 0.8069        |
| 100        | 1        | 0.8148        |
| 100        | 2        | 0.8215        |
| <b>100</b> | <b>8</b> | <b>0.8226</b> |
| 100        | 32       | 0.8176        |
| 200        | 0.03125  | 0.7639        |
| 200        | 0.125    | 0.7886        |
| 200        | 0.5      | 0.8069        |
| 200        | 1        | 0.8148        |
| 200        | 2        | 0.8215        |
| 200        | 8        | 0.8226        |
| 200        | 32       | 0.8176        |
| 300        | 0.03125  | 0.7639        |
| 300        | 0.125    | 0.7886        |
| 300        | 0.5      | 0.8069        |
| 300        | 1        | 0.8148        |
| 300        | 2        | 0.8215        |
| 300        | 8        | 0.8226        |
| 300        | 32       | 0.8176        |
| 400        | 0.03125  | 0.7639        |
| 400        | 0.125    | 0.7886        |
| 400        | 0.5      | 0.8069        |
| 400        | 1        | 0.8148        |
| 400        | 2        | 0.8215        |
| 400        | 8        | 0.8226        |
| 400        | 32       | 0.8176        |
| 500        | 0.03125  | 0.7639        |
| 500        | 0.125    | 0.7886        |
| 500        | 0.5      | 0.8069        |
| 500        | 1        | 0.8148        |
| 500        | 2        | 0.8215        |
| 500        | 8        | 0.8226        |
| 500        | 32       | 0.8176        |

---
