# Supplementary material for: moSCminer: a cell subtype classification framework based on the attention neural network integrating the single-cell multi-omics dataset on the cloud
Source: PeerJ journal article supplement (doi:10.7717/peerj.17006), 2024-02-26
Supplement: SupplementaryTableS5.pdf [file SupplementaryTableS5.pdf]

**SupplementaryMaterial S5.**

Average cell subtype-wise performance results for cell subtype predictions of moSCminer with its variant and the baseline methods based on 5-fold cross-validation.

| GSE136718 | Cell subtype | moSCminer (omics-attn) | moSCminer (no-attn) | RF           | SVM          | LR           | NB    |
|-----------|--------------|------------------------|---------------------|--------------|--------------|--------------|-------|
| Accuracy  | 2cell        | <b>1.000</b>           | <b>1.000</b>        | <b>1.000</b> | <b>1.000</b> | <b>1.000</b> | 0.971 |
|           | 4cell        | <b>0.991</b>           | 0.962               | 0.971        | 0.976        | 0.971        | 0.924 |
|           | 8cell        | 0.995                  | 0.995               | <b>1.000</b> | 0.995        | 0.991        | 0.910 |
|           | ICM          | <b>1.000</b>           | <b>1.000</b>        | <b>1.000</b> | <b>1.000</b> | 0.995        | 0.929 |
|           | Late4cell    | <b>0.991</b>           | 0.962               | 0.971        | 0.971        | 0.967        | 0.933 |
|           | Morula       | 0.995                  | 0.995               | <b>1.000</b> | <b>1.000</b> | 0.995        | 0.943 |
|           | TE           | <b>1.000</b>           | <b>1.000</b>        | <b>1.000</b> | <b>1.000</b> | 0.995        | 0.924 |
|           | Zygote       | <b>1.000</b>           | <b>1.000</b>        | <b>1.000</b> | <b>1.000</b> | <b>1.000</b> | 0.981 |
| F1-score  | 2cell        | <b>1.000</b>           | <b>1.000</b>        | <b>1.000</b> | <b>1.000</b> | <b>1.000</b> | 0.870 |
|           | 4cell        | <b>0.977</b>           | 0.906               | 0.930        | 0.937        | 0.928        | 0.808 |
|           | 8cell        | 0.960                  | 0.987               | <b>1.000</b> | 0.985        | 0.973        | 0.736 |
|           | ICM          | <b>1.000</b>           | <b>1.000</b>        | <b>1.000</b> | <b>1.000</b> | 0.987        | 0.784 |
|           | Late4cell    | <b>0.953</b>           | 0.780               | 0.847        | 0.825        | 0.798        | 0.565 |
|           | Morula       | 0.982                  | 0.978               | <b>1.000</b> | <b>1.000</b> | 0.978        | 0.671 |
|           | TE           | <b>1.000</b>           | <b>1.000</b>        | <b>1.000</b> | <b>1.000</b> | 0.978        | 0.576 |
|           | Zygote       | <b>1.000</b>           | <b>1.000</b>        | <b>1.000</b> | <b>1.000</b> | <b>1.000</b> | 0.820 |
| ROC-AUC   | 2cell        | <b>1.000</b>           | <b>1.000</b>        | <b>1.000</b> | <b>1.000</b> | <b>1.000</b> | 0.967 |
|           | 4cell        | <b>0.986</b>           | 0.952               | 0.982        | 0.985        | 0.982        | 0.921 |
|           | 8cell        | 0.967                  | 0.988               | <b>1.000</b> | 0.997        | 0.994        | 0.900 |
|           | ICM          | <b>1.000</b>           | <b>1.000</b>        | <b>1.000</b> | <b>1.000</b> | 0.997        | 0.869 |
|           | Late4cell    | <b>0.981</b>           | 0.894               | 0.879        | 0.858        | 0.842        | 0.760 |
|           | Morula       | 0.997                  | 0.997               | <b>1.000</b> | <b>1.000</b> | 0.980        | 0.789 |
|           | TE           | <b>1.000</b>           | <b>1.000</b>        | <b>1.000</b> | <b>1.000</b> | 0.980        | 0.819 |
|           | Zygote       | <b>1.000</b>           | <b>1.000</b>        | <b>1.000</b> | <b>1.000</b> | <b>1.000</b> | 0.867 |

| GSE154762 | Cell subtype | moSCminer (omics-attn) | moSCminer (no-attn) | RF    | SVM          | LR           | NB    |
|-----------|--------------|------------------------|---------------------|-------|--------------|--------------|-------|
| Accuracy  | FGO          | <b>0.993</b>           | 0.984               | 0.992 | 0.989        | 0.984        | 0.922 |
|           | GO1          | <b>0.994</b>           | 0.971               | 0.986 | 0.983        | 0.972        | 0.940 |
|           | GO2          | <b>0.992</b>           | 0.971               | 0.983 | 0.982        | 0.971        | 0.950 |
|           | Granulosa    | 0.991                  | 0.984               | 0.990 | <b>0.994</b> | 0.993        | 0.912 |
|           | Immune       | 0.997                  | 0.999               | 0.999 | <b>1.000</b> | <b>1.000</b> | 0.980 |
|           | MI           | <b>0.982</b>           | 0.945               | 0.976 | 0.961        | 0.949        | 0.859 |
|           | MII          | <b>0.989</b>           | 0.954               | 0.981 | 0.971        | 0.963        | 0.891 |
|           | StromaC1     | <b>0.998</b>           | 0.912               | 0.953 | 0.920        | 0.911        | 0.797 |
| StromaC2  | <b>0.993</b> | 0.911                  | 0.954               | 0.923 | 0.909        | 0.786        |       |
| F1-score  | FGO          | <b>0.953</b>           | 0.911               | 0.965 | 0.932        | 0.907        | 0.560 |
|           | GO1          | <b>0.922</b>           | 0.712               | 0.861 | 0.829        | 0.741        | 0.537 |
|           | GO2          | <b>0.870</b>           | 0.600               | 0.741 | 0.740        | 0.607        | 0.504 |
|           | Granulosa    | 0.954                  | 0.910               | 0.941 | <b>0.973</b> | 0.963        | 0.613 |
|           | Immune       | 0.978                  | 0.978               | 0.921 | <b>1.000</b> | <b>1.000</b> | 0.160 |
|           | MI           | <b>0.950</b>           | 0.844               | 0.928 | 0.884        | 0.854        | 0.544 |
|           | MII          | <b>0.942</b>           | 0.768               | 0.898 | 0.848        | 0.808        | 0.505 |
|           | StromaC1     | <b>0.995</b>           | 0.790               | 0.890 | 0.808        | 0.784        | 0.468 |
| StromaC2  | <b>0.982</b> | 0.780                  | 0.882               | 0.810 | 0.781        | 0.457        |       |
| ROC-AUC   | FGO          | <b>0.986</b>           | 0.944               | 0.961 | 0.949        | 0.944        | 0.763 |
|           | GO1          | <b>0.981</b>           | 0.913               | 0.965 | 0.946        | 0.919        | 0.874 |
|           | GO2          | <b>0.946</b>           | 0.754               | 0.811 | 0.840        | 0.760        | 0.765 |
|           | Granulosa    | 0.956                  | 0.926               | 0.980 | <b>0.991</b> | 0.968        | 0.818 |
|           | Immune       | 0.999                  | 0.999               | 0.930 | <b>1.000</b> | <b>1.000</b> | 0.550 |
|           | MI           | <b>0.984</b>           | 0.914               | 0.963 | 0.936        | 0.920        | 0.715 |
|           | MII          | <b>0.951</b>           | 0.873               | 0.933 | 0.914        | 0.885        | 0.744 |
|           | StromaC1     | <b>0.999</b>           | 0.872               | 0.936 | 0.882        | 0.865        | 0.661 |
| StromaC2  | <b>0.992</b> | 0.859                  | 0.918               | 0.877 | 0.863        | 0.661        |       |

| GSE140203        | Cell subtype              | moSCminer<br>(omics-attn) | moSCminer<br>(no-attn) | RF    | SVM   | LR    | NB    |
|------------------|---------------------------|---------------------------|------------------------|-------|-------|-------|-------|
| Accuracy         | Basal                     | <b>0.998</b>              | 0.966                  | 0.994 | 0.927 | 0.953 | 0.802 |
|                  | Dermal Fibroblast         | <b>0.999</b>              | 0.994                  | 0.997 | 0.993 | 0.995 | 0.971 |
|                  | Dermal Papilla            | <b>0.998</b>              | 0.995                  | 0.996 | 0.995 | 0.995 | 0.969 |
|                  | Dermal Sheath             | <b>0.999</b>              | 0.997                  | 0.996 | 0.996 | 0.996 | 0.966 |
|                  | Endothelial               | <b>0.999</b>              | 0.994                  | 0.998 | 0.993 | 0.993 | 0.976 |
|                  | Granular                  | <b>0.999</b>              | 0.993                  | 0.995 | 0.992 | 0.992 | 0.970 |
|                  | Hair Shaft-cuticle-cortex | <b>0.998</b>              | 0.987                  | 0.997 | 0.983 | 0.986 | 0.972 |
|                  | IRS                       | <b>0.999</b>              | 0.989                  | 0.997 | 0.985 | 0.987 | 0.969 |
|                  | Infundibulum              | <b>0.997</b>              | 0.964                  | 0.984 | 0.947 | 0.958 | 0.887 |
|                  | Isthmus                   | <b>0.999</b>              | 0.991                  | 0.998 | 0.986 | 0.989 | 0.919 |
|                  | K6+ Bulge Companion Layer | <b>0.999</b>              | 0.994                  | 0.997 | 0.991 | 0.993 | 0.982 |
|                  | Macrophage DC             | <b>1.000</b>              | 0.997                  | 0.998 | 0.995 | 0.996 | 0.982 |
|                  | Medulla                   | <b>0.998</b>              | 0.985                  | 0.996 | 0.982 | 0.984 | 0.964 |
|                  | Melanocyte                | <b>1.000</b>              | 0.999                  | 0.998 | 0.999 | 0.999 | 0.989 |
|                  | ORS                       | <b>0.999</b>              | 0.993                  | 0.998 | 0.992 | 0.992 | 0.979 |
|                  | Schwann Cell              | <b>0.999</b>              | 0.998                  | 0.999 | 0.996 | 0.997 | 0.852 |
|                  | Sebaceous Gland           | <b>1.000</b>              | 0.999                  | 0.999 | 0.998 | 0.998 | 0.978 |
|                  | Spinous                   | <b>0.997</b>              | 0.971                  | 0.994 | 0.955 | 0.966 | 0.910 |
|                  | TAC-1                     | <b>0.995</b>              | 0.959                  | 0.972 | 0.944 | 0.952 | 0.908 |
|                  | TAC-2                     | <b>0.998</b>              | 0.981                  | 0.995 | 0.979 | 0.980 | 0.969 |
| ahighCD34+ bulge | <b>0.999</b>              | 0.986                     | 0.998                  | 0.978 | 0.983 | 0.906 |       |
| alowCD34+ bulge  | <b>0.998</b>              | 0.981                     | 0.997                  | 0.975 | 0.978 | 0.943 |       |
| F1-score         | Basal                     | <b>0.995</b>              | 0.929                  | 0.987 | 0.858 | 0.905 | 0.651 |
|                  | Dermal Fibroblast         | <b>0.980</b>              | 0.918                  | 0.955 | 0.898 | 0.922 | 0.286 |
|                  | Dermal Papilla            | <b>0.968</b>              | 0.884                  | 0.909 | 0.884 | 0.892 | 0.281 |
|                  | Dermal Sheath             | <b>0.945</b>              | 0.873                  | 0.804 | 0.834 | 0.845 | 0.126 |
|                  | Endothelial               | <b>0.976</b>              | 0.901                  | 0.958 | 0.869 | 0.877 | 0.330 |
|                  | Granular                  | <b>0.924</b>              | 0.503                  | 0.576 | 0.373 | 0.391 | 0.105 |
|                  | Hair Shaft-cuticle-cortex | <b>0.978</b>              | 0.822                  | 0.953 | 0.769 | 0.806 | 0.578 |
|                  | IRS                       | <b>0.969</b>              | 0.726                  | 0.909 | 0.635 | 0.676 | 0.397 |
|                  | Infundibulum              | <b>0.987</b>              | 0.865                  | 0.941 | 0.801 | 0.841 | 0.330 |
|                  | Isthmus                   | <b>0.979</b>              | 0.775                  | 0.941 | 0.629 | 0.716 | 0.228 |
|                  | K6+ Bulge Companion Layer | <b>0.969</b>              | 0.811                  | 0.903 | 0.689 | 0.763 | 0.273 |
|                  | Macrophage DC             | <b>0.977</b>              | 0.805                  | 0.828 | 0.625 | 0.728 | 0.075 |
|                  | Medulla                   | <b>0.967</b>              | 0.755                  | 0.930 | 0.671 | 0.718 | 0.162 |
|                  | Melanocyte                | <b>0.961</b>              | 0.900                  | 0.837 | 0.884 | 0.873 | 0.378 |
|                  | ORS                       | <b>0.982</b>              | 0.896                  | 0.959 | 0.877 | 0.878 | 0.539 |
|                  | Schwann Cell              | <b>0.941</b>              | 0.724                  | 0.823 | 0.456 | 0.542 | 0.035 |
|                  | Sebaceous Gland           | <b>0.992</b>              | 0.887                  | 0.847 | 0.839 | 0.851 | 0.273 |
|                  | Spinous                   | <b>0.987</b>              | 0.853                  | 0.972 | 0.763 | 0.823 | 0.195 |
|                  | TAC-1                     | <b>0.978</b>              | 0.804                  | 0.881 | 0.742 | 0.777 | 0.285 |
|                  | TAC-2                     | <b>0.965</b>              | 0.685                  | 0.919 | 0.615 | 0.648 | 0.283 |
| ahighCD34+ bulge | <b>0.991</b>              | 0.853                     | 0.973                  | 0.767 | 0.814 | 0.449 |       |
| alowCD34+ bulge  | <b>0.985</b>              | 0.836                     | 0.973                  | 0.788 | 0.811 | 0.107 |       |
| ROC-AUC          | Basal                     | <b>0.996</b>              | 0.955                  | 0.989 | 0.919 | 0.946 | 0.789 |
|                  | Dermal Fibroblast         | <b>0.988</b>              | 0.971                  | 0.985 | 0.950 | 0.959 | 0.585 |
|                  | Dermal Papilla            | <b>0.983</b>              | 0.928                  | 0.968 | 0.930 | 0.930 | 0.616 |
|                  | Dermal Sheath             | <b>0.965</b>              | 0.919                  | 0.837 | 0.890 | 0.896 | 0.570 |
|                  | Endothelial               | <b>0.990</b>              | 0.946                  | 0.974 | 0.917 | 0.933 | 0.602 |
|                  | Granular                  | <b>0.967</b>              | 0.698                  | 0.703 | 0.629 | 0.648 | 0.585 |
|                  | Hair Shaft-cuticle-cortex | <b>0.988</b>              | 0.909                  | 0.955 | 0.879 | 0.897 | 0.760 |
|                  | IRS                       | <b>0.982</b>              | 0.860                  | 0.917 | 0.809 | 0.818 | 0.736 |
|                  | Infundibulum              | <b>0.994</b>              | 0.934                  | 0.987 | 0.900 | 0.920 | 0.602 |
|                  | Isthmus                   | <b>0.984</b>              | 0.876                  | 0.944 | 0.785 | 0.830 | 0.736 |
|                  | K6+ Bulge Companion Layer | <b>0.975</b>              | 0.910                  | 0.912 | 0.812 | 0.863 | 0.607 |
|                  | Macrophage DC             | <b>0.978</b>              | 0.865                  | 0.855 | 0.747 | 0.830 | 0.570 |
|                  | Medulla                   | <b>0.983</b>              | 0.867                  | 0.950 | 0.804 | 0.842 | 0.552 |
|                  | Melanocyte                | <b>0.967</b>              | 0.927                  | 0.861 | 0.902 | 0.907 | 0.784 |
|                  | ORS                       | <b>0.988</b>              | 0.945                  | 0.961 | 0.925 | 0.933 | 0.694 |
|                  | Schwann Cell              | <b>0.953</b>              | 0.806                  | 0.853 | 0.658 | 0.712 | 0.665 |
|                  | Sebaceous Gland           | <b>0.992</b>              | 0.937                  | 0.868 | 0.888 | 0.894 | 0.818 |

|                  |              |       |       |       |       |       |
|------------------|--------------|-------|-------|-------|-------|-------|
| Spinous          | <b>0.994</b> | 0.918 | 0.990 | 0.861 | 0.902 | 0.554 |
| TAC-1            | <b>0.992</b> | 0.893 | 0.982 | 0.871 | 0.886 | 0.586 |
| TAC-2            | <b>0.980</b> | 0.824 | 0.925 | 0.770 | 0.795 | 0.597 |
| ahighCD34+ bulge | <b>0.993</b> | 0.927 | 0.974 | 0.868 | 0.893 | 0.844 |
| alowCD34+ bulge  | <b>0.994</b> | 0.916 | 0.978 | 0.888 | 0.906 | 0.529 |

---
