# Supplementary material for: moSCminer: a cell subtype classification framework based on the attention neural network integrating the single-cell multi-omics dataset on the cloud
Source: PeerJ journal article supplement (doi:10.7717/peerj.17006), 2024-02-26
Supplement: SupplementaryTableS6.pdf [file SupplementaryTableS6.pdf]

**SupplementaryMaterial S6.**

Top 30 features showing the highest average attention scores from each omics, related to the subtype classification within cells.

**GSE136718**

| Gene expression | DNA methylation   | DNA accessibility |
|-----------------|-------------------|-------------------|
| Prdm10          | Sfi1_cpg          | Ncam1_acc         |
| A530040E14Rik   | RP23-191E3.2_cpg  | Zim1_acc          |
| Wipf1           | H2-Q1_cpg         | RP23-282N17.2_acc |
| AC123856.4-3    | Etl4_cpg          | Sema4a_acc        |
| Bptf            | Kalrn_cpg         | Ankrd24_acc       |
| H2-Q1           | Ndr4_cpg          | Trim2_acc         |
| Ranbp3          | Fkbp5_cpg         | Phactr3_acc       |
| Mcart1          | Pcdha5_cpg        | H2-Q1_acc         |
| 8430427H17Rik   | Itsn1_cpg         | SNORA17_acc       |
| Ndst1           | Triobp_cpg        | Kcng1_acc         |
| 2410001C21Rik   | Sp110_cpg         | Shank1_acc        |
| AC116997.3-1    | Col23a1_cpg       | Bruno15_acc       |
| Fkbp5           | Tmem116_cpg       | Kpna1_acc         |
| 2410025L10Rik   | Trim2_cpg         | C130026I21Rik_acc |
| RP23-326E2.2    | Fhad1_cpg         | Pde4d_acc         |
| Kalrn           | Ncam1_cpg         | Ccdc64_acc        |
| Furin           | Smarcd1_cpg       | 9330129D05Rik_acc |
| Tmem194         | Kpna1_cpg         | Mcart1_acc        |
| Etl4            | AC123856.4-3_cpg  | Shb_acc           |
| Prkcd           | C130026I21Rik_cpg | Etfb_acc          |
| C130026I21Rik   | Kcng1_cpg         | AC123856.4-3_acc  |
| Taf3            | Synj2_cpg         | Sh3bp5_acc        |
| 4933407C03Rik   | Ccdc64_cpg        | Capns1_acc        |
| Tef             | Ank3_cpg          | Tspan5_acc        |
| Itsn1           | Wipf1_cpg         | 4933407C03Rik_acc |
| Ccdc64          | Sh3bp5_cpg        | Elfn1_acc         |
| Sp110           | Coro2a_cpg        | Prdm10_acc        |
| Sp140           | 4933407C03Rik_cpg | 2410001C21Rik_acc |
| Cic             | 9330129D05Rik_cpg | Pcdha5_acc        |
| Fam129b         | Shank1_cpg        | Ntm_acc           |

**GSE154762**

| Gene expression | DNA methylation | DNA accessibility |
|-----------------|-----------------|-------------------|
| RORA            | C1RL_cpg        | SOX6_acc          |
| ABCA12          | PCDH7_cpg       | ARHGAP15_acc      |
| RAB11A          | SGCA_cpg        | CTNNA3_acc        |
| C1orf21         | MEPCE_cpg       | FAF1_acc          |
| TJP1            | LINC00484_cpg   | FRMD6_acc         |
| COBLL1          | NBPF1_cpg       | IFT43_acc         |
| RBMS1           | ANKRD18CP_cpg   | WDR64_acc         |

|         |                |                   |
|---------|----------------|-------------------|
| SLC35F2 | ENPP6_cpg      | LRP1B_acc         |
| SCP2    | GATA5_cpg      | TMEFF2_acc        |
| SETBP1  | FANK1_cpg      | PAPPA2_acc        |
| ANK3    | BTN2A2_cpg     | ERC1_acc          |
| CAMK1D  | C19orf25_cpg   | SOX9-AS1_acc      |
| TSHZ2   | NR2F1_cpg      | RNF219-AS1_acc    |
| MAP2    | ERI2_cpg       | VIT_acc           |
| CYFIP1  | MIR570_cpg     | HERC2P3_acc       |
| ADD3    | TEKT4P2_cpg    | ATAD2B_acc        |
| MAPK8   | ZNF595_cpg     | AK7_acc           |
| SPTBN1  | MST1P2_cpg     | ADAMTS18_acc      |
| GAS7    | ANKRD30BP2_cpg | LYST_acc          |
| TMOD3   | LINC00960_cpg  | PPP4R4_acc        |
| MYO5B   | LINC00491_cpg  | MAP4K3_acc        |
| MREG    | LINC00273_cpg  | SUSD4_acc         |
| FOXN3   | ROCK1P1_cpg    | STON1-GTF2A1L_acc |
| CERS6   | FEZF1-AS1_cpg  | RPH3A_acc         |
| NEBL    | DLEU1_cpg      | SMG6_acc          |
| PARD3   | LRFN5_cpg      | SLCO3A1_acc       |
| CCNY    | NME8_cpg       | BMPR1A_acc        |
| KAZN    | NETO1_cpg      | EPC1_acc          |
| JMJD1C  | MUC16_cpg      | MYO3B_acc         |
| FRMD6   | C8orf58_cpg    | DCLK1_acc         |

---
