# Supplementary material for: moSCminer: a cell subtype classification framework based on the attention neural network integrating the single-cell multi-omics dataset on the cloud
Source: PeerJ journal article supplement (doi:10.7717/peerj.17006), 2024-02-26
Supplement: SupplementaryTableS7.pdf [file SupplementaryTableS7.pdf]

**SupplementaryMaterial S7.**

Average cell subtype classification performance using different omics profiles in GSE140203.

Gene expression and DNA accessibility were denoted as 'gene' and 'acc', respectively.

| # of omics             | Metric   | moSCminer    | RF    | SVM   | LR    | NB    |
|------------------------|----------|--------------|-------|-------|-------|-------|
| Multi-omics            | Accuracy | <b>0.983</b> | 0.944 | 0.790 | 0.829 | 0.382 |
|                        | F1-score | <b>0.983</b> | 0.944 | 0.786 | 0.827 | 0.379 |
| Single omics<br>(gene) | Accuracy | <b>0.768</b> | 0.640 | 0.759 | 0.753 | 0.179 |
|                        | F1-score | <b>0.760</b> | 0.604 | 0.754 | 0.749 | 0.246 |
| Single omics<br>(acc)  | Accuracy | <b>0.950</b> | 0.941 | 0.589 | 0.762 | 0.287 |
|                        | F1-score | <b>0.951</b> | 0.941 | 0.525 | 0.754 | 0.256 |
